# Supplementary material
Source: MDPI journal article supplement (https://www.mdpi.com/1424-8247/14/8/792)
Supplement: s1 [file s1]

## **Supplementary Materials for**

### **Chirality-dependent anti-inflammatory effect of glutathione after spinal cord injury in an animal model**

Seong-Jun Kim <sup>1</sup>, Wan-Kyu Ko <sup>1</sup>, Gong-Ho Han <sup>1</sup>, Daye Lee <sup>1</sup>, Yuhan Lee <sup>2</sup>, Seung-Hun Sheen <sup>3</sup>, Je-Beom Hong <sup>4</sup>, Seil Sohn <sup>3,\*</sup>

<sup>1</sup> Department of Biomedical Science, CHA University, Seongnam-si, Gyeonggi-do, 13493, Republic of Korea; ksj987456@chauniv.ac.kr (S.J.K.); wankyu@chauniv.ac.kr (W.-K.K.); hgh429@chauniv.ac.kr (H.G.H.); day03@chauniv.ac.kr (D.L.).

<sup>2</sup> Department of Medicine, Brigham and Women's Hospital, Harvard Medical School, Boston, MA, 02115, USA; ylee21@bwh.harvard.edu (Y.L.).

<sup>3</sup> Department of Neurosurgery, CHA Bundang Medical Center, Seongnam-si, Gyeonggi-do, 13496, Republic of Korea; nssheen@cha.ac.kr (S.H.S.); sisohn@cha.ac.kr (S.S.).

<sup>4</sup> Department of Neurosurgery, Kangbuk Samsung Hospital, Sungkyunkwan University School of Medicine, Seoul, 03181, Republic of Korea; jebeomhong@gmail.com (J.B.H.).

\* Corresponding author: sisohn@cha.ac.kr; Tel: +82-31-881-7966

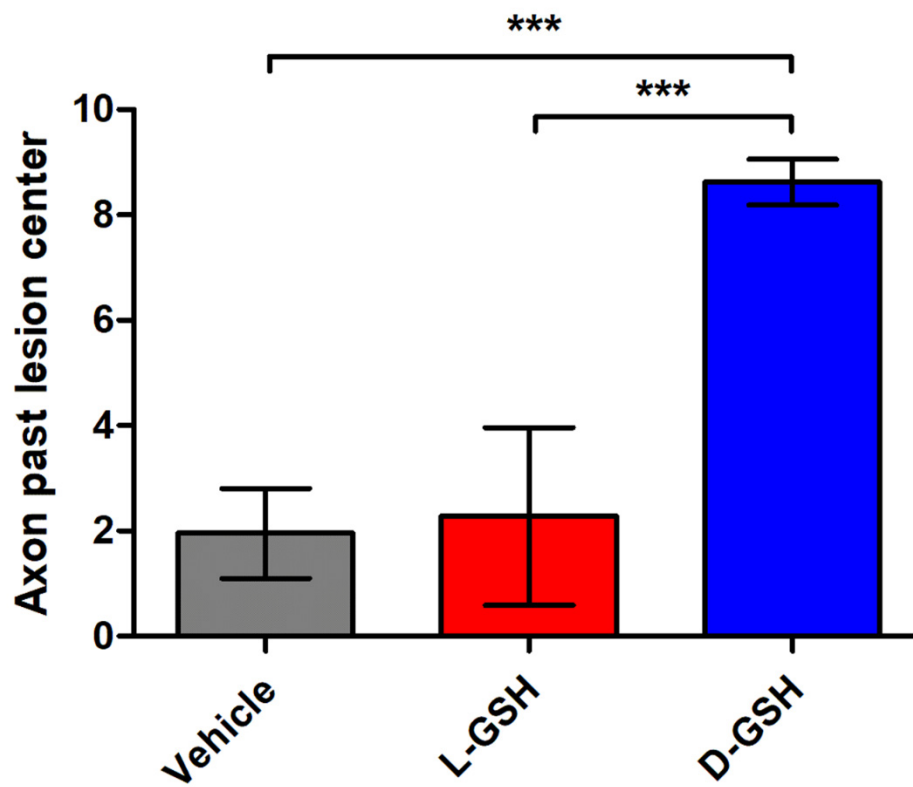

**Figure S1.** Quantitative analyses of BDA-labelled axons past the lesion center in the vehicle, L-GSH, and D-GSH groups are shown. Results are the mean  $\pm$  SEM; \* $p < 0.05$ , \*\* $p < 0.01$ , and \*\*\* $p < 0.001$ ; one-way ANOVA with Tukey post-hoc test.

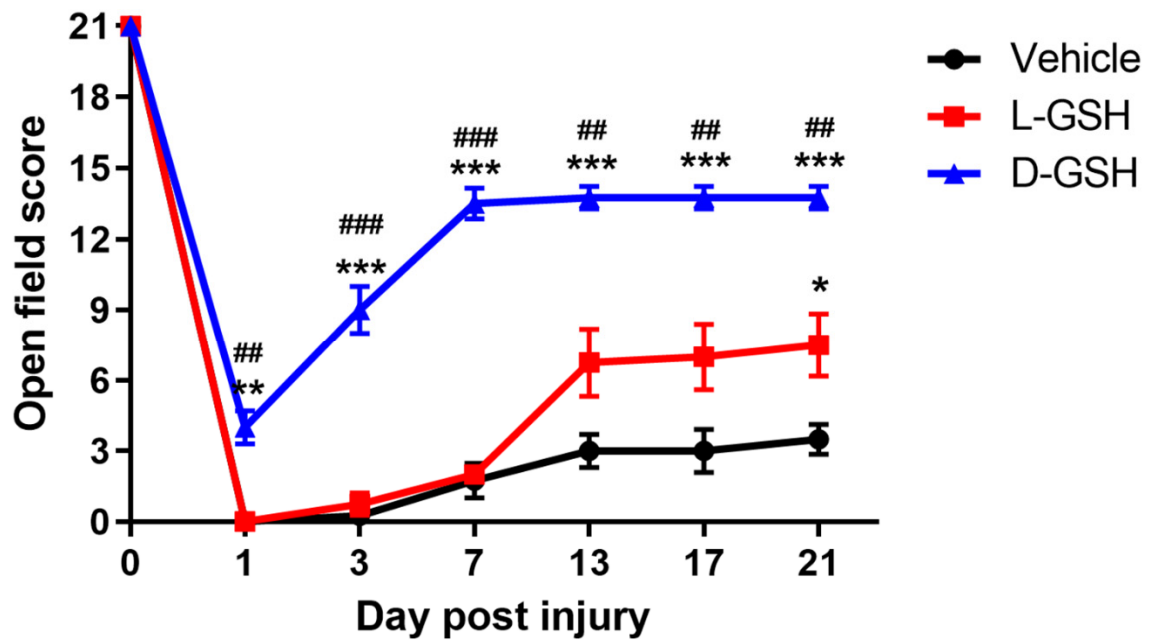

**Figure S2.** Comparison of BBB locomotor scores in the vehicle, L-GSH, and D-GSH groups. The BBB scores were evaluated for 21 days after SCI. \* denotes a significant difference between the vehicle group and the D-GSH group. # denotes a significant difference between the L-GSH group and the D-GSH group. Results are the mean  $\pm$  standard deviation (SD); \* $p < 0.05$ , \*\* $p < 0.01$ , and \*\*\* $p < 0.001$ . Unpaired two-tailed Student's t-tests.

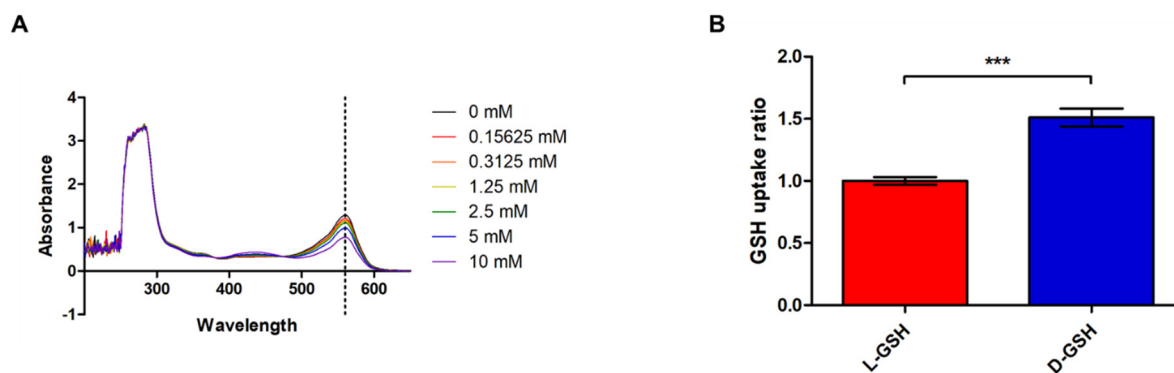

**Figure S3.** Comparative evaluation of the intracellular uptake ratios of the chiral GSHs. **(A)** Absorbance of various GSH concentrations. **(B)** Intracellular uptake ratios of macrophages treated with L- or D-GSH based on (A). The fold ratio of the L-GSH group was set to 1-fold and the relative fold change was calculated. Results are the mean  $\pm$  SEM; \*  $p < 0.05$ , \*\*  $p < 0.01$ , and \*\*\*  $p < 0.001$ ; one-way ANOVA with Tukey post-hoc test.
